# Supplementary material for: Enantioselective Effects of Metalaxyl Enantiomers on Breast Cancer Cells Metabolic Profiling Using HPLC-QTOF-Based Metabolomics
Source: PubMed Central journal article supplement (PMC5297775; doi:10.3390/ijms18010142), 2017-01-12
Supplement: ijms-18-00142-s001.pdf [file ijms-18-00142-s001.pdf]

# Supplementary Materials: Enantioselective Effects of Metalaxyl Enantiomers on Breast Cancer Cells Metabolic Profiling Using HPLC-QTOF-Based Metabolomics

Ping Zhang, Wentao Zhu, Dezhen Wang, Jin Yan, Yao Wang and Lin He

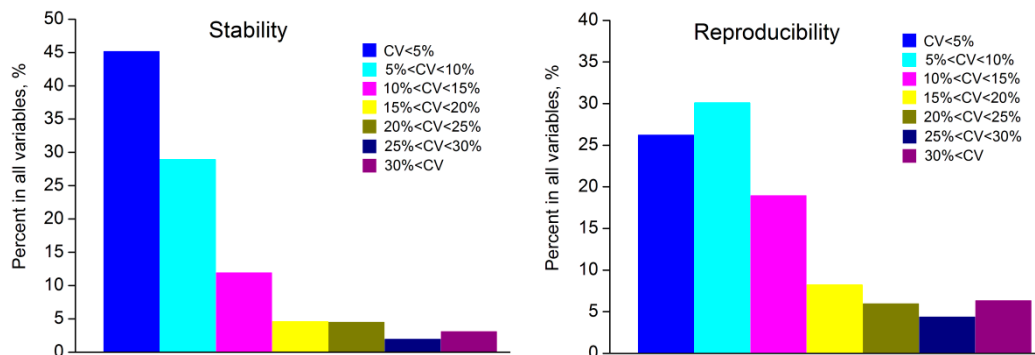

**Figure S1.** The stability and reproducibility of high-performance liquid chromatography coupled with quadrupole time-of-flight tandem mass spectrometry (HPLC-QTOF) method.

**Table S1.** The gradient of high-performance liquid chromatography coupled with quadrupole time-of-flight tandem mass spectrometry (HPLC-QTOF) separation.

| Time (min) | Flow Rate ( $\mu\text{L}/\text{min}$ ) | Mobile Phase A | Mobile Phase B |
|------------|----------------------------------------|----------------|----------------|
| 0          | 300                                    | 10             | 90             |
| 1.5        | 300                                    | 10             | 90             |
| 5          | 300                                    | 50             | 50             |
| 12         | 300                                    | 50             | 50             |
| 14         | 300                                    | 10             | 90             |
| 20         | 300                                    | 10             | 90             |
| 30         | 300                                    | 10             | 90             |
